# Supplementary material
Source: MDPI journal article supplement (https://www.mdpi.com/2304-6740/10/10/162)
Supplement: s1 [file s1]

# Synthesis of 3D cadmium(II)-carboxylate framework having potential for co-catalyst free CO<sub>2</sub> fixation to cyclic carbonates

Zafar A. K. Khattak <sup>1,2</sup>, Nazir Ahmad <sup>3,\*</sup>, Hussein A. Younus <sup>4,5</sup>, Habib Ullah <sup>6</sup>, Baoyi Yu <sup>7</sup>,  
Khurram S. Munawar <sup>8</sup>, Muhammad Ashfaq <sup>9</sup>, Sher Ali <sup>10</sup>, Hossain M. Shahadat <sup>11</sup>  
and Francis Verpoort <sup>1,12,\*</sup>

<sup>1</sup> State Key Laboratory of Advanced Technology for Materials Synthesis and Processing, Wuhan University of Technology, Wuhan 430070, China

<sup>2</sup> Institute of Chemistry, Baghdad-ul-Jadeed Campus, The Islamia University of Bahawalpur, Bahawalpur 63100, Pakistan

<sup>3</sup> Chemistry Department, Government College University Lahore, Lahore 54000, Pakistan

<sup>4</sup> Chemistry Department, Faculty of Science, Fayoum University, Fayoum 63514, Egypt

<sup>5</sup> Department of Chemical and Petroleum Engineering, College of Engineering, Sultan Qaboos University, Al Khould, P.O Box 33, Muscat PC 123, Oman

<sup>6</sup> Department of Material Science and Engineering, Chungnam National University, Daejeon 34134, Korea

<sup>7</sup> Key Laboratory of Urban Agriculture (North China), Ministry of Agriculture, College of Biological Sciences Engineering, Beijing University of Agriculture, Beijing 102206, China

<sup>8</sup> Department of Chemistry, University of Mianwali, Mianwali 42200, Pakistan

<sup>9</sup> Department of Physics, University of Sargodha, Sargodha 40100, Pakistan

<sup>10</sup> Department of Chemistry, Khushal Khan Khattak University Karak, Karak 27200, Pakistan

<sup>11</sup> Department of Chemistry, Faculty of Science, Comilla University, Comilla 3506, Bangladesh

<sup>12</sup> Research School of Chemical and Biomedical Technologies, National Research Tomsk Polytechnic University, Lenin Avenue 30, 634050 Tomsk, Russia

\* Correspondence: dr.nazirahmad@gcu.edu.pk (N.A.); francis@whut.edu.cn (F.V.)

## Contents

|                                                     |                         |
|-----------------------------------------------------|-------------------------|
| 1. NMR Spectra of Ligand                            | Figures S1-S2           |
| 2. Single Crystal Data                              | Tables S1-S3, Figure S3 |
| 3. NMR Spectra of Carbon Dioxide Fixation Reactions | Figures S4-S5           |

## 1. NMR Spectra of Ligand

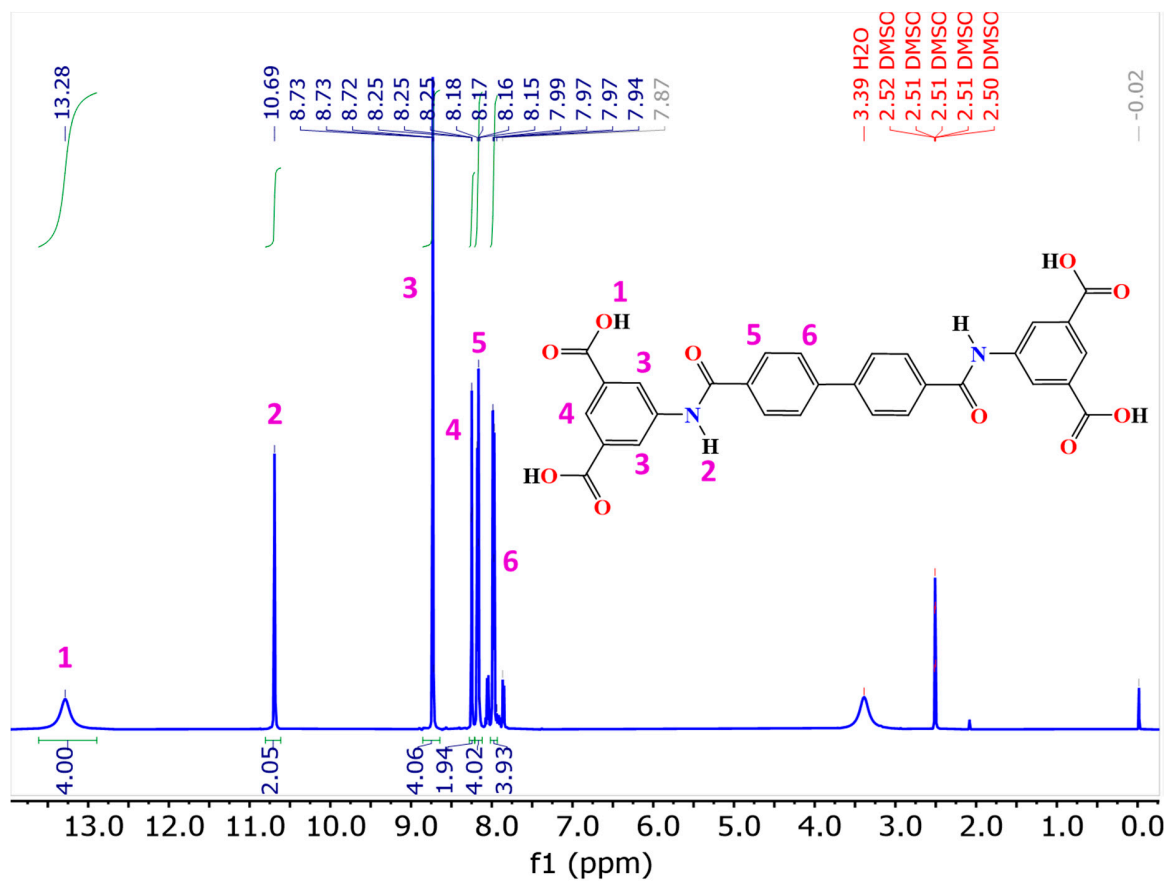

Figure S1.  $^1H$ -NMR spectra of ligand acid ( $H_4L$ )

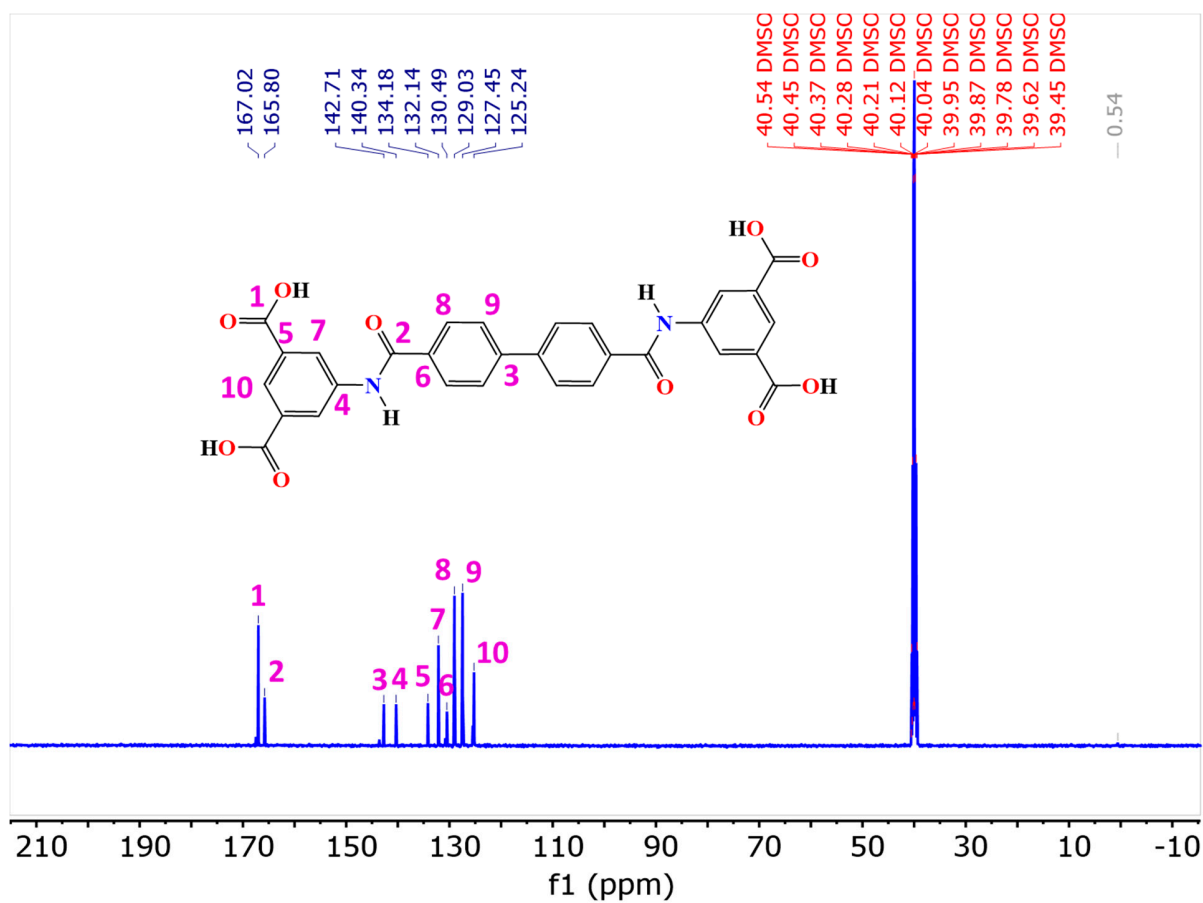

Figure S2.  $^{13}\text{C}$ -NMR spectra of ligand acid ( $\text{H}_4\text{L}$ )

## 2. Single Crystal Data

Table S1. Single crystal XRD experimental description of 3D-CdMOF.

| Crystal data                           | CdMOF                                                          |
|----------------------------------------|----------------------------------------------------------------|
| CCDC                                   | 2097250                                                        |
| Chemical formula                       | $\text{C}_{33}\text{H}_{27}\text{Cd}_2\text{N}_3\text{O}_{13}$ |
| $M_r$                                  | 898.37                                                         |
| Crystal system, space group            | Monoclinic, $P2_1/n$                                           |
| Temperature (K)                        | 296                                                            |
| $a, b, c$ (Å)                          | 14.184(3), 14.503(3), 21.814(5)                                |
| $\alpha, \beta, \gamma$ (°)            | 90, 99.035 (5), 90                                             |
| $V$ (Å <sup>3</sup> )                  | 4431.7(17)                                                     |
| $Z$                                    | 4                                                              |
| Density (calculated)/g/cm <sup>3</sup> | 1.347                                                          |
| $F(000)$                               | 1784                                                           |
| Radiation type                         | Mo $K\alpha$                                                   |
| Wavelength (Å)                         | 0.71073                                                        |
| $\mu$ (mm <sup>-1</sup> )              | 1.014                                                          |

|                                                                               |                               |
|-------------------------------------------------------------------------------|-------------------------------|
| Crystal size (mm)                                                             | 0.25 × 0.24 × 0.18            |
| <b>Data Collection</b>                                                        |                               |
| Diffractionmeter                                                              | Bruker APEX-II CCD            |
| Absorption correction                                                         | multi-scan                    |
| No. of measured, independent and observed<br>[ $I > 2\sigma(I)$ ] reflections | 7511, 7511, 5462              |
| Theta range for data collection (°)                                           | 2.531 to 26.987               |
| ( $\sin \theta/\lambda$ ) <sub>max</sub> (Å <sup>-1</sup> )                   | 0.595                         |
| <b>Data Refinement</b>                                                        |                               |
| $R[F^2 > 2\sigma(F^2)]$ , $wR(F^2)$ , $S$                                     | 0.086, 0.282, 1.11            |
| No. of reflections                                                            | 7511                          |
| No. of parameters                                                             | 480                           |
| No. of restraints                                                             | 603                           |
| H-atom treatment                                                              | H-atom parameters constrained |
| $\Delta Q_{\max}$ , $\Delta Q_{\min}$ (e Å <sup>-3</sup> )                    | 2.59, -1.25                   |

**Note:** While creating the CCDC cif entry, we performed the refinement by using SQUEEZE software and there were only a few residual peaks (non-ordered density of electrons) which we excluded <sup>a</sup>. The main reason for this was that the orientations or the positions of such specific electronic density peaks were very strange because these were quite randomly oriented and were not corresponding to any of the complete solvent molecule (neither DMF nor water) as guest(s). The difference between the crystallographic formula (the bulk formula) with CHN analysis might be due to removing those few strangely observed electron densities from the refinement model. As the unbound (guest) solvent is missing in the crystallographic representation so the bulk formula has a small difference from the CHN data.

<sup>a</sup> The following peaks were removed during the refinement

|    |   |        |        |         |          |      |      |
|----|---|--------|--------|---------|----------|------|------|
| Q1 | 1 | 0.3811 | 0.8963 | -0.4713 | 11.00000 | 0.05 | 6.99 |
| Q2 | 1 | 0.7002 | 0.5377 | -0.0468 | 11.00000 | 0.05 | 5.94 |
| Q3 | 1 | 0.1539 | 0.6733 | -0.8731 | 11.00000 | 0.05 | 4.04 |
| Q4 | 1 | 0.3455 | 0.5224 | -0.8546 | 11.00000 | 0.05 | 3.69 |
| Q5 | 1 | 0.3254 | 0.5336 | -0.7959 | 11.00000 | 0.05 | 3.30 |
| Q6 | 1 | 0.7156 | 0.5184 | -0.0971 | 11.00000 | 0.05 | 3.16 |
| Q7 | 1 | 0.0992 | 0.8137 | -0.9518 | 11.00000 | 0.05 | 2.75 |
| Q8 | 1 | 0.5928 | 0.7592 | -0.5502 | 11.00000 | 0.05 | 2.59 |
| Q9 | 1 | 0.4331 | 0.5474 | -0.8594 | 11.00000 | 0.05 | 2.31 |

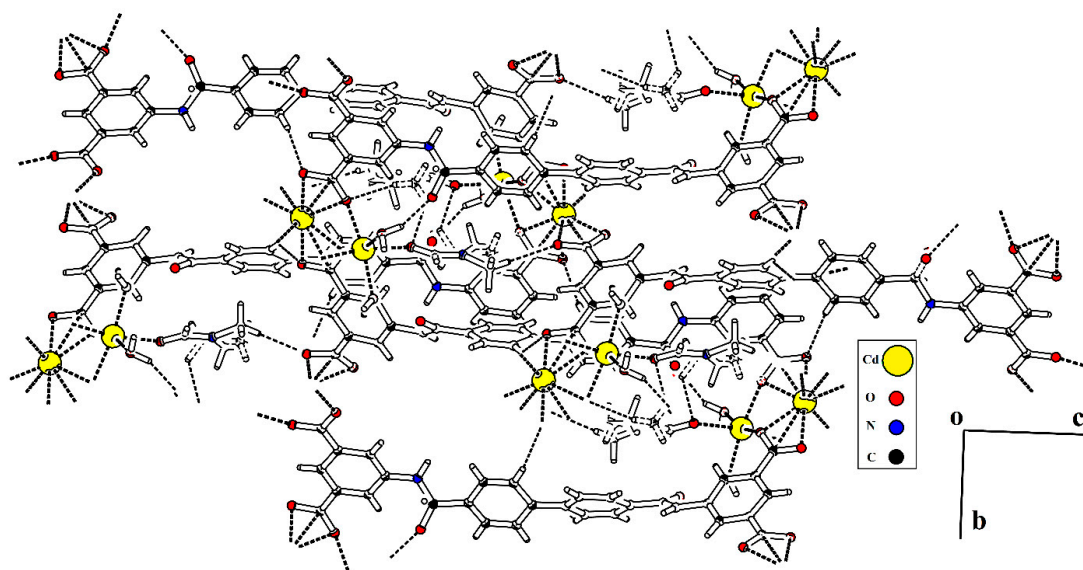

**Figure S3.** Packing diagram of CdMOF. Selected H-atoms are shown for clarity.

**Table S2.** Selected bond lengths (Å) and angles (°) in CdMOF.

| Bonds                                   | Bond Lengths (Å) | Bonds                                    | Bond Lengths (Å) |
|-----------------------------------------|------------------|------------------------------------------|------------------|
| Cd1-O11                                 | 2.266(8)         | Cd2-O9 <sup>i</sup>                      | 2.226(7)         |
| Cd1-O12                                 | 2.259(9)         | Cd2-O2                                   | 2.485(6)         |
| Cd1-O00C                                | 2.259(8)         | Cd2-O4 <sup>ii</sup>                     | 2.365(7)         |
| Cd1-O10 <sup>i</sup>                    | 2.217(9)         | Cd2-O3 <sup>ii</sup>                     | 2.331(6)         |
| Cd1-O7 <sup>iii</sup>                   | 2.321(7)         | Cd2-O8 <sup>iii</sup>                    | 2.487(7)         |
| Cd1-O1                                  | 2.291(7)         | Cd2-O7 <sup>iii</sup>                    | 2.403(7)         |
| Cd2-O1                                  | 2.374(7)         |                                          |                  |
| Bonds                                   | Bond Angles (°)  | Bonds                                    | Bond Angles (°)  |
| O7 <sup>iii</sup> -Cd1-O1               | 73.6(2)          | O1-Cd2-O3 <sup>ii</sup>                  | 98.5(2)          |
| O7 <sup>iii</sup> -Cd1-O10 <sup>i</sup> | 88.1(3)          | O1-Cd2-O8 <sup>iii</sup>                 | 124.3(2)         |
| O7 <sup>iii</sup> -Cd1-O11              | 171.0(3)         | O1-Cd2-O7 <sup>iii</sup>                 | 70.7(2)          |
| O7 <sup>iii</sup> -Cd1-O12              | 92.2(3)          | O9 <sup>i</sup> -Cd2-O2                  | 87.5(3)          |
| O7 <sup>iii</sup> -Cd1-O00C             | 100.5(3)         | O9 <sup>i</sup> -Cd2-O4 <sup>ii</sup>    | 97.5(3)          |
| O1-Cd1-O10 <sup>i</sup>                 | 88.7(3)          | O9 <sup>i</sup> -Cd2-O3 <sup>ii</sup>    | 153.8(3)         |
| O1-Cd1-O11                              | 99.7(3)          | O9 <sup>i</sup> -Cd2-O8 <sup>iii</sup>   | 90.2(3)          |
| O1-Cd1-O12                              | 165.4(3)         | O9 <sup>i</sup> -Cd2-O7 <sup>iii</sup>   | 103.8(3)         |
| O1-Cd1-O00C                             | 89.0(3)          | O2-Cd2-O4 <sup>iii</sup>                 | 90.0(2)          |
| O10 <sup>i</sup> -Cd1-O11               | 85.8(3)          | O2-Cd2-O3 <sup>ii</sup>                  | 89.4(2)          |
| O10 <sup>i</sup> -Cd1-O12               | 94.5(4)          | O2-Cd2-O8 <sup>v</sup>                   | 176.3(2)         |
| O10 <sup>i</sup> -Cd1-O00C              | 170.1(4)         | O2-Cd2-O7 <sup>iii</sup>                 | 124.1(2)         |
| O11-Cd1-O12                             | 94.8(4)          | O4 <sup>ii</sup> -Cd2-O3 <sup>ii</sup>   | 56.4(2)          |
| O11-Cd1-O00C                            | 85.1(3)          | O4 <sup>ii</sup> -Cd2-O8 <sup>iii</sup>  | 93.1(2)          |
| O12-Cd1-O00C                            | 90.2(3)          | O4 <sup>ii</sup> -Cd2-O7 <sup>iii</sup>  | 139.8(2)         |
| O1-Cd2-O9 <sup>i</sup>                  | 100.5(3)         | O3 <sup>ii</sup> -Cd2-O8 <sup>iii</sup>  | 93.9(2)          |
| O1-Cd2-O2                               | 53.5(2)          | O3 <sup>ii</sup> -Cd2-O7 <sup>iii</sup>  | 99.4(2)          |
| O1-Cd2-O4 <sup>ii</sup>                 | 137.9(2)         | O8 <sup>iii</sup> -Cd2-O7 <sup>iii</sup> | 53.7(2)          |

**Table S3.** Hydrogen-bond geometry (Å, °) for **CdMOF**.

| <i>D</i> —H... <i>A</i>        | <i>D</i> —H | H... <i>A</i> | <i>D</i> ... <i>A</i> | <( <i>D</i> —H... <i>A</i> ) <sup>°</sup> |
|--------------------------------|-------------|---------------|-----------------------|-------------------------------------------|
| O12—H12B...O6 <sup>i</sup>     | 0.88        | 2.29          | 3.08(4)               | 150                                       |
| O12—H21B...O6A <sup>i</sup>    | 0.88        | 1.90          | 2.73(2)               | 157                                       |
| C28—H28...O6                   | 0.93        | 2.08          | 2.67(4)               | 120                                       |
| C28—H28...O6A                  | 0.93        | 2.32          | 2.81(2)               | 112                                       |
| C32A—H32D...O00C <sup>ii</sup> | 0.96        | 2.37          | 3.07(7)               | 129                                       |
| C32A—H32D...N3 <sup>ii</sup>   | 0.96        | 2.69          | 3.65(9)               | 173                                       |
| C32A—H32E...O7 <sup>iii</sup>  | 0.96        | 2.53          | 3.47(3)               | 168                                       |
| C33—H33A...O3 <sup>iv</sup>    | 0.96        | 2.42          | 3.36(3)               | 166                                       |
| C33A—H33F...O7 <sup>iii</sup>  | 0.96        | 2.50          | 3.44(5)               | 168                                       |
| <i>C</i> —H... $\pi$           | <i>C</i> —H | H... $\pi$    | <i>C</i> ... $\pi$    | <( <i>C</i> —H... $\pi$ ) <sup>°</sup>    |
| C33—H33C...Cg2                 | 0.96        | 2.99          | 3.68 (4)              | 130                                       |

**Symmetry codes:** (i)  $-x+1/2, y+1/2, -z-3/2$ ; (ii)  $-x+1, -y+2, -z-2$ ; (iii)  $x+1/2, -y+3/2, z-1/2$ ; (iv)  $x-1/2, -y+3/2, z-3/2$ . Cg2 is the centroid of phenyl ring (C10-C15) in **CdMOF**.

### 3. NMR Spectra of Carbon Dioxide Fixation Reactions

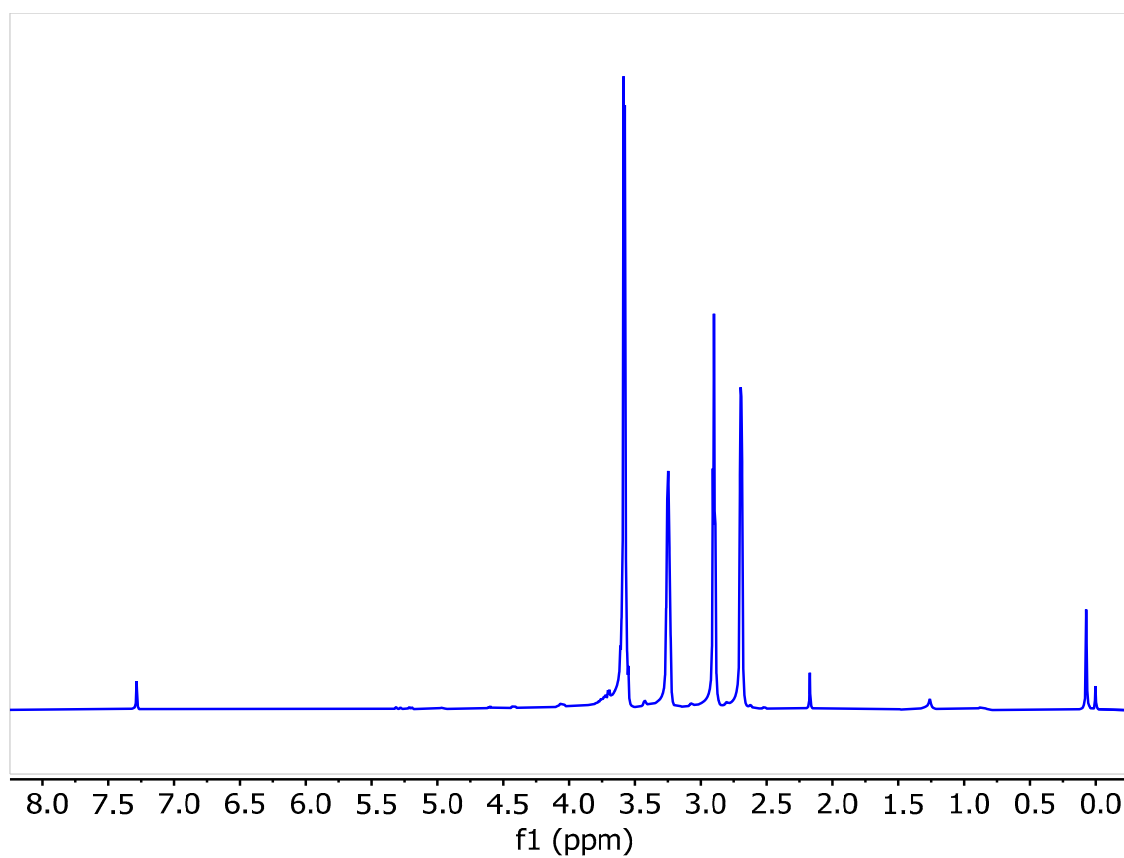

**Figure S4:**  $^1\text{H}$ -NMR spectrum in  $\text{CDCl}_3$  of the reaction mixture obtained from the conversion of epichlorohydrin after 12 h in absence of catalyst

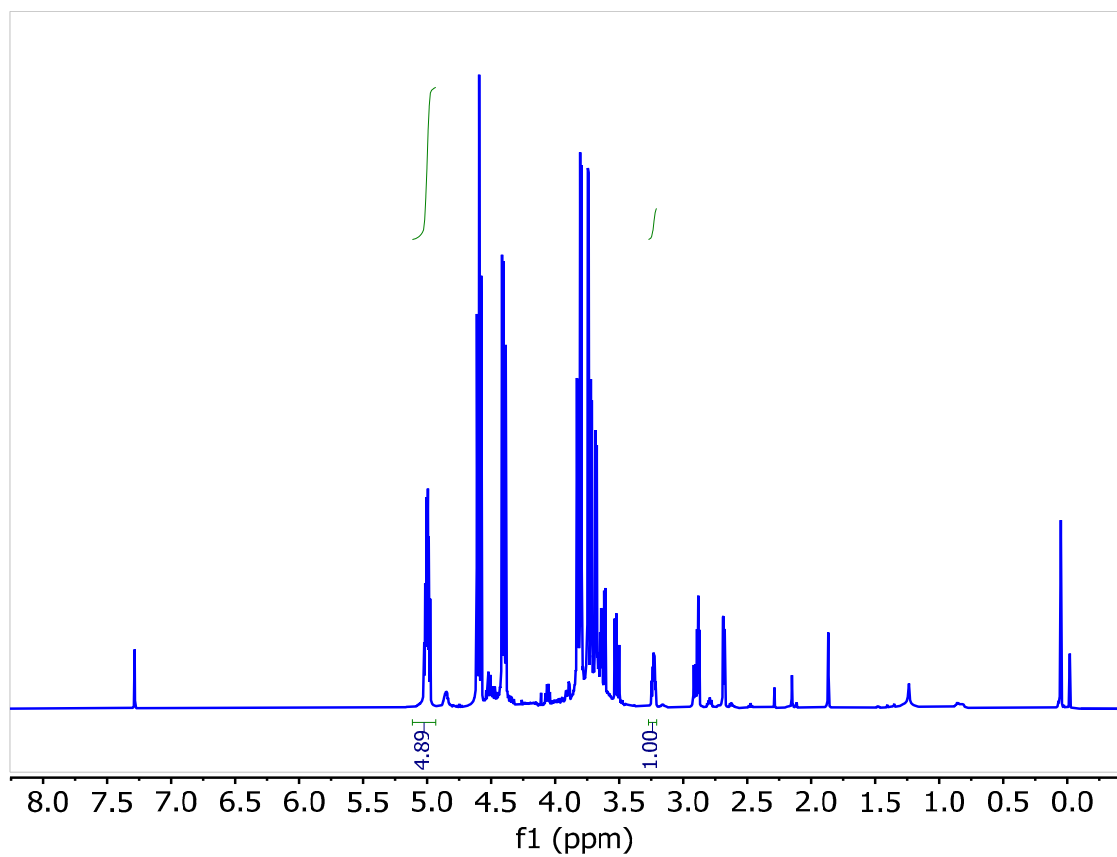

**Figure S5:**  $^1\text{H}$ -NMR spectrum in  $\text{CDCl}_3$  of the reaction mixture obtained from the conversion of epichlorohydrin after 12 h using CdMOF as a catalyst.
